# Supplementary material for: How Americans encounter guns: Mixed methods content analysis of YouTube and internet search data
Source: bioRxiv or medRxiv preprint supplement (doi:10.1101/2022.07.15.22276403), 2022-07-20
Supplement: Supplementary file [file media-1.pdf]

Supplemental Table

Firearms-related YouTube videos

| <b>Channel Name</b> | <b>Ecosystem</b> | <b>Link</b>                                                                                                                                                               |
|---------------------|------------------|---------------------------------------------------------------------------------------------------------------------------------------------------------------------------|
| DALLMYD             | Guns 4 Fun       | <a href="https://www.youtube.com/watch?v=MwAMidqytE">https://www.youtube.com/watch?v=MwAMidqytE</a>                                                                       |
| Aaron Esser         | Guns 4 Fun       | <a href="https://www.youtube.com/watch?v=4rsPcCjMk1o">https://www.youtube.com/watch?v=4rsPcCjMk1o</a>                                                                     |
| DALLMYD             | Guns 4 Fun       | <a href="https://www.youtube.com/watch?v=VIjK-KXeNHY">https://www.youtube.com/watch?v=VIjK-KXeNHY</a>                                                                     |
| Aaron Esser         | Guns 4 Fun       | <a href="https://www.youtube.com/watch?v=KEW9U7s_zks">https://www.youtube.com/watch?v=KEW9U7s_zks</a>                                                                     |
| Silo Entertainment  | Guns 4 Fun       | <a href="https://www.youtube.com/watch?v=-DnjilZrdZI">https://www.youtube.com/watch?v=-DnjilZrdZI</a>                                                                     |
| Silo Entertainment  | Guns 4 Fun       | <a href="https://www.youtube.com/watch?v=_jNkrHunting &amp; FishingYsAQg">https://www.youtube.com/watch?v=_jNkrHunting &amp; FishingYsAQg</a>                             |
| Wag Entertainment   | Guns 4 Fun       | <a href="https://www.youtube.com/watch?v=Bt2bkKc2at4">https://www.youtube.com/watch?v=Bt2bkKc2at4</a>                                                                     |
| Corridor            | Guns 4 Fun       | <a href="https://www.youtube.com/watch?v=9MrnAJsxLHunting &amp; Fishingc">https://www.youtube.com/watch?v=9MrnAJsxLHunting &amp; Fishingc</a>                             |
| AleksWorkshop       | Guns 4 Fun       | <a href="https://www.youtube.com/watch?v=VIHct1bpGuI">https://www.youtube.com/watch?v=VIHct1bpGuI</a>                                                                     |
| Corridor            | Guns 4 Fun       | <a href="https://www.youtube.com/watch?v=0v3dYHgeXOU">https://www.youtube.com/watch?v=0v3dYHgeXOU</a>                                                                     |
| Corridor            | Guns 4 Fun       | <a href="https://www.youtube.com/watch?v=VI4NZWHunting &amp; FishingqGuns &amp; GearnU">https://www.youtube.com/watch?v=VI4NZWHunting &amp; FishingqGuns &amp; GearnU</a> |
| Handler             | Guns 4 Fun       | <a href="https://www.youtube.com/watch?v=HwywIPHHunting &amp; FishingIcw">https://www.youtube.com/watch?v=HwywIPHHunting &amp; FishingIcw</a>                             |
| NICKMERCs           | Guns 4 Fun       | <a href="https://www.youtube.com/watch?v=BnVHunting &amp; FishingrR2NQAg">https://www.youtube.com/watch?v=BnVHunting &amp; FishingrR2NQAg</a>                             |
| Wag Entertainment   | Guns 4 Fun       | <a href="https://www.youtube.com/watch?v=I7Z0PfeBeGg">https://www.youtube.com/watch?v=I7Z0PfeBeGg</a>                                                                     |
| Dysmo               | Guns 4 Fun       | <a href="https://www.youtube.com/watch?v=0jVVvD9JaNE">https://www.youtube.com/watch?v=0jVVvD9JaNE</a>                                                                     |
| NOVRITSCH           | Guns 4 Fun       | <a href="https://www.youtube.com/watch?v=77kW2UT_XMg">https://www.youtube.com/watch?v=77kW2UT_XMg</a>                                                                     |
| NOVRITSCH           | Guns 4 Fun       | <a href="https://www.youtube.com/watch?v=M-j-ghZiUBc">https://www.youtube.com/watch?v=M-j-ghZiUBc</a>                                                                     |

| <b>Channel Name</b> | <b>Ecosystem</b> | <b>Link</b>                                                                                                                                                               |
|---------------------|------------------|---------------------------------------------------------------------------------------------------------------------------------------------------------------------------|
| Swagg               | Guns 4 Fun       | <a href="https://www.youtube.com/watch?v=S9_DiOxLI-0">https://www.youtube.com/watch?v=S9_DiOxLI-0</a>                                                                     |
| Handler             | Guns 4 Fun       | <a href="https://www.youtube.com/watch?v=M9eBnC CmkXo">https://www.youtube.com/watch?v=M9eBnC CmkXo</a>                                                                   |
| NICKMERCs           | Guns 4 Fun       | <a href="https://www.youtube.com/watch?v=Nc0g-BbZo3g">https://www.youtube.com/watch?v=Nc0g-BbZo3g</a>                                                                     |
| NICKMERCs           | Guns 4 Fun       | <a href="https://www.youtube.com/watch?v=OPnnGuns &amp; GearsdoUjU">https://www.youtube.com/watch?v=OPnnGuns &amp; GearsdoUjU</a>                                         |
| NICKMERCs           | Guns 4 Fun       | <a href="https://www.youtube.com/watch?v=xy49MoviesqOoEhg">https://www.youtube.com/watch?v=xy49MoviesqOoEhg</a>                                                           |
| Swagg               | Guns 4 Fun       | <a href="https://www.youtube.com/watch?v=PxfRSmc hq7M">https://www.youtube.com/watch?v=PxfRSmc hq7M</a>                                                                   |
| Swagg               | Guns 4 Fun       | <a href="https://www.youtube.com/watch?v=zsIVm4UnQKk">https://www.youtube.com/watch?v=zsIVm4UnQKk</a>                                                                     |
| TheKoreanSavage     | Guns 4 Fun       | <a href="https://www.youtube.com/watch?v=cPyam2Guns &amp; Gear_bR0">https://www.youtube.com/watch?v=cPyam2Guns &amp; Gear_bR0</a>                                         |
| Top WARZONE Moments | Guns 4 Fun       | <a href="https://www.youtube.com/watch?v=hp9y4IwbvJk">https://www.youtube.com/watch?v=hp9y4IwbvJk</a>                                                                     |
| AleksWorkshop       | Guns 4 Fun       | <a href="https://www.youtube.com/watch?v=MWTnLxKXLIM">https://www.youtube.com/watch?v=MWTnLxKXLIM</a>                                                                     |
| AleksWorkshop       | Guns 4 Fun       | <a href="https://www.youtube.com/watch?v=MXJF71j bAZg">https://www.youtube.com/watch?v=MXJF71j bAZg</a>                                                                   |
| AleksWorkshop       | Guns 4 Fun       | <a href="https://www.youtube.com/watch?v=ywBQzm3WVEA">https://www.youtube.com/watch?v=ywBQzm3WVEA</a>                                                                     |
| Dysmo               | Guns 4 Fun       | <a href="https://www.youtube.com/watch?v=4PVD9d AFFyM">https://www.youtube.com/watch?v=4PVD9d AFFyM</a>                                                                   |
| Greg Renko          | Guns 4 Fun       | <a href="https://www.youtube.com/watch?v=fYIqDqZ LI4">https://www.youtube.com/watch?v=fYIqDqZ LI4</a>                                                                     |
| Greg Renko          | Guns 4 Fun       | <a href="https://www.youtube.com/watch?v=P1BOLrb 1qUA">https://www.youtube.com/watch?v=P1BOLrb 1qUA</a>                                                                   |
| Hectorlo            | Guns 4 Fun       | <a href="https://www.youtube.com/watch?v=C20tbGGuns &amp; Gear3tHHunting &amp; Fishing">https://www.youtube.com/watch?v=C20tbGGuns &amp; Gear3tHHunting &amp; Fishing</a> |
| TheKoreanSavage     | Guns 4 Fun       | <a href="https://www.youtube.com/watch?v=n2Hunting &amp; FishingXPVGAqRk">https://www.youtube.com/watch?v=n2Hunting &amp; FishingXPVGAqRk</a>                             |
| TheKoreanSavage     | Guns 4 Fun       | <a href="https://www.youtube.com/watch?v=xadkCDB iNqU">https://www.youtube.com/watch?v=xadkCDB iNqU</a>                                                                   |
| Top WARZONE Moments | Guns 4 Fun       | <a href="https://www.youtube.com/watch?v=Guns &amp; Geare2CG9DeEo4">https://www.youtube.com/watch?v=Guns &amp; Geare2CG9DeEo4</a>                                         |

| <b>Channel Name</b> | <b>Ecosystem</b> | <b>Link</b>                                                                                                                                                               |
|---------------------|------------------|---------------------------------------------------------------------------------------------------------------------------------------------------------------------------|
| Top WARZONE Moments | Guns 4 Fun       | <a href="https://www.youtube.com/watch?v=hycGMj7qVw">https://www.youtube.com/watch?v=hycGMj7qVw</a>                                                                       |
| WhackyCast          | Guns 4 Fun       | <a href="https://www.youtube.com/watch?v=nFYQyXw4bso">https://www.youtube.com/watch?v=nFYQyXw4bso</a>                                                                     |
| WhackyCast          | Guns 4 Fun       | <a href="https://www.youtube.com/watch?v=puyDqyZ9Hunting &amp; Fishingk">https://www.youtube.com/watch?v=puyDqyZ9Hunting &amp; Fishingk</a>                               |
| WhackyCast          | Guns 4 Fun       | <a href="https://www.youtube.com/watch?v=v4uyOODiIcU">https://www.youtube.com/watch?v=v4uyOODiIcU</a>                                                                     |
| Hectorlo            | Guns 4 Fun       | <a href="https://www.youtube.com/watch?v=9fGm2EgeZM0">https://www.youtube.com/watch?v=9fGm2EgeZM0</a>                                                                     |
| Hectorlo            | Guns 4 Fun       | <a href="https://www.youtube.com/watch?v=BGtLmiHunting &amp; FishingYQPw">https://www.youtube.com/watch?v=BGtLmiHunting &amp; FishingYQPw</a>                             |
| Hectorlo            | Guns 4 Fun       | <a href="https://www.youtube.com/watch?v=dGuns &amp; GearEhHunting &amp; FishingfrYaI">https://www.youtube.com/watch?v=dGuns &amp; GearEhHunting &amp; FishingfrYaI</a>   |
| Hectorlo            | Guns 4 Fun       | <a href="https://www.youtube.com/watch?v=QDLfTTcokG0">https://www.youtube.com/watch?v=QDLfTTcokG0</a>                                                                     |
| Hectorlo            | Guns 4 Fun       | <a href="https://www.youtube.com/watch?v=zlftiNBKsIE">https://www.youtube.com/watch?v=zlftiNBKsIE</a>                                                                     |
| ABC News            | News & Hot Takes | <a href="https://www.youtube.com/watch?v=TAGuns &amp; Gearbvn9eHunting &amp; FishingOc">https://www.youtube.com/watch?v=TAGuns &amp; Gearbvn9eHunting &amp; FishingOc</a> |
| New York Daily News | News & Hot Takes | <a href="https://www.youtube.com/watch?v=rhW0BtEyHMoviesM">https://www.youtube.com/watch?v=rhW0BtEyHMoviesM</a>                                                           |
| CNN                 | News & Hot Takes | <a href="https://www.youtube.com/watch?v=Hunting &amp; FishinggfdOXBjfGuns &amp; GearQ">https://www.youtube.com/watch?v=Hunting &amp; FishinggfdOXBjfGuns &amp; GearQ</a> |
| Inside Edition      | News & Hot Takes | <a href="https://www.youtube.com/watch?v=UVBcGuns &amp; GearZ_CkME">https://www.youtube.com/watch?v=UVBcGuns &amp; GearZ_CkME</a>                                         |
| ABC News            | News & Hot Takes | <a href="https://www.youtube.com/watch?v=MoviesqOGuns &amp; GearFEYItqw">https://www.youtube.com/watch?v=MoviesqOGuns &amp; GearFEYItqw</a>                               |
| Inside Edition      | News & Hot Takes | <a href="https://www.youtube.com/watch?v=lqAtdo19rUE">https://www.youtube.com/watch?v=lqAtdo19rUE</a>                                                                     |
| NBC News            | News & Hot Takes | <a href="https://www.youtube.com/watch?v=uYJtnEGCGs0">https://www.youtube.com/watch?v=uYJtnEGCGs0</a>                                                                     |
| Fox News            | News & Hot Takes | <a href="https://www.youtube.com/watch?v=Guns &amp; GearVSsZSvWIE4">https://www.youtube.com/watch?v=Guns &amp; GearVSsZSvWIE4</a>                                         |
| NBC News            | News & Hot Takes | <a href="https://www.youtube.com/watch?v=FLo14GMYos">https://www.youtube.com/watch?v=FLo14GMYos</a>                                                                       |
| CNN                 | News & Hot Takes | <a href="https://www.youtube.com/watch?v=eCSoLCmJwOs">https://www.youtube.com/watch?v=eCSoLCmJwOs</a>                                                                     |

| <b>Channel Name</b>    | <b>Ecosystem</b> | <b>Link</b>                                                                                                                                                                           |
|------------------------|------------------|---------------------------------------------------------------------------------------------------------------------------------------------------------------------------------------|
| StevenCrowder          | News & Hot Takes | <a href="https://www.youtube.com/watch?v=WtftZPL-k7Y">https://www.youtube.com/watch?v=WtftZPL-k7Y</a>                                                                                 |
| StevenCrowder          | News & Hot Takes | <a href="https://www.youtube.com/watch?v=Y4Movies-HE91Us">https://www.youtube.com/watch?v=Y4Movies-HE91Us</a>                                                                         |
| Fox News               | News & Hot Takes | <a href="https://www.youtube.com/watch?v=UoHunting &amp; Fishing0D42DxUM">https://www.youtube.com/watch?v=UoHunting &amp; Fishing0D42DxUM</a>                                         |
| David Pakman Show      | News & Hot Takes | <a href="https://www.youtube.com/watch?v=nQMaavxqG7w">https://www.youtube.com/watch?v=nQMaavxqG7w</a>                                                                                 |
| CBS News               | News & Hot Takes | <a href="https://www.youtube.com/watch?v=j1mq1PHunting &amp; FishingV_Hunting &amp; Fishings">https://www.youtube.com/watch?v=j1mq1PHunting &amp; FishingV_Hunting &amp; Fishings</a> |
| CBS News               | News & Hot Takes | <a href="https://www.youtube.com/watch?v=LLzDGKp1myY">https://www.youtube.com/watch?v=LLzDGKp1myY</a>                                                                                 |
| Active Self Protection | News & Hot Takes | <a href="https://www.youtube.com/watch?v=Uig4YPzNctHunting &amp; Fishing">https://www.youtube.com/watch?v=Uig4YPzNctHunting &amp; Fishing</a>                                         |
| David Pakman Show      | News & Hot Takes | <a href="https://www.youtube.com/watch?v=l2nUvB91Zac">https://www.youtube.com/watch?v=l2nUvB91Zac</a>                                                                                 |
| NBC4 Columbus          | News & Hot Takes | <a href="https://www.youtube.com/watch?v=XA43iOuxQN4">https://www.youtube.com/watch?v=XA43iOuxQN4</a>                                                                                 |
| Active Self Protection | News & Hot Takes | <a href="https://www.youtube.com/watch?v=MQjUSG Cp9FM">https://www.youtube.com/watch?v=MQjUSG Cp9FM</a>                                                                               |
| FOX 2 St. Louis        | News & Hot Takes | <a href="https://www.youtube.com/watch?v=geRT7_AmxtQ">https://www.youtube.com/watch?v=geRT7_AmxtQ</a>                                                                                 |
| Guardian News          | News & Hot Takes | <a href="https://www.youtube.com/watch?v=vK_WDxjhu0Y">https://www.youtube.com/watch?v=vK_WDxjhu0Y</a>                                                                                 |
| The Daily Wire         | News & Hot Takes | <a href="https://www.youtube.com/watch?v=HJpKQ3j-BEHunting &amp; Fishing">https://www.youtube.com/watch?v=HJpKQ3j-BEHunting &amp; Fishing</a>                                         |
| NBC4 Columbus          | News & Hot Takes | <a href="https://www.youtube.com/watch?v=Guns &amp; GearDx3wVuR-wQ">https://www.youtube.com/watch?v=Guns &amp; GearDx3wVuR-wQ</a>                                                     |
| KHOU 11                | News & Hot Takes | <a href="https://www.youtube.com/watch?v=r3UCssBKwpU">https://www.youtube.com/watch?v=r3UCssBKwpU</a>                                                                                 |
| The Daily Wire         | News & Hot Takes | <a href="https://www.youtube.com/watch?v=eNJrMjO_AEU">https://www.youtube.com/watch?v=eNJrMjO_AEU</a>                                                                                 |
| Guardian News          | News & Hot Takes | <a href="https://www.youtube.com/watch?v=oRQyuGuns &amp; GearGuns &amp; GearzGE4">https://www.youtube.com/watch?v=oRQyuGuns &amp; GearGuns &amp; GearzGE4</a>                         |
| New York Daily News    | News & Hot Takes | <a href="https://www.youtube.com/watch?v=3hVxYeyocZ0">https://www.youtube.com/watch?v=3hVxYeyocZ0</a>                                                                                 |
| New York Daily News    | News & Hot Takes | <a href="https://www.youtube.com/watch?v=Guns &amp; GearJYMd4CvkJY">https://www.youtube.com/watch?v=Guns &amp; GearJYMd4CvkJY</a>                                                     |

| <b>Channel Name</b> | <b>Ecosystem</b> | <b>Link</b>                                                                                                                                                                                                                               |
|---------------------|------------------|-------------------------------------------------------------------------------------------------------------------------------------------------------------------------------------------------------------------------------------------|
| KHOU 11             | News & Hot Takes | <a href="https://www.youtube.com/watch?v=CsOTRKARITM">https://www.youtube.com/watch?v=CsOTRKARITM</a>                                                                                                                                     |
| KHOU 11             | News & Hot Takes | <a href="https://www.youtube.com/watch?v=mLSLhSCt-WHunting &amp; Fishing">https://www.youtube.com/watch?v=mLSLhSCt-WHunting &amp; Fishing</a>                                                                                             |
| FOX 2 St. Louis     | News & Hot Takes | <a href="https://www.youtube.com/watch?v=3MyCIhz iSIg">https://www.youtube.com/watch?v=3MyCIhz iSIg</a>                                                                                                                                   |
| FOX 2 St. Louis     | News & Hot Takes | <a href="https://www.youtube.com/watch?v=4yuo-D4BH0g">https://www.youtube.com/watch?v=4yuo-D4BH0g</a>                                                                                                                                     |
| FOX 2 St. Louis     | News & Hot Takes | <a href="https://www.youtube.com/watch?v=gZtSHunting &amp; FishingHunting &amp; FishingMoviesDwSQ">https://www.youtube.com/watch?v=gZtSHunting &amp; FishingHunting &amp; FishingMoviesDwSQ</a>                                           |
| FOX 2 St. Louis     | News & Hot Takes | <a href="https://www.youtube.com/watch?v=HIGuns &amp; Geart_rY9g9M">https://www.youtube.com/watch?v=HIGuns &amp; Geart_rY9g9M</a>                                                                                                         |
| FOX 2 St. Louis     | News & Hot Takes | <a href="https://www.youtube.com/watch?v=hTwcWwFuZjU">https://www.youtube.com/watch?v=hTwcWwFuZjU</a>                                                                                                                                     |
| FOX 2 St. Louis     | News & Hot Takes | <a href="https://www.youtube.com/watch?v=iiYe23-rL0A">https://www.youtube.com/watch?v=iiYe23-rL0A</a>                                                                                                                                     |
| FOX 2 St. Louis     | News & Hot Takes | <a href="https://www.youtube.com/watch?v=iwFgcXuRPA">https://www.youtube.com/watch?v=iwFgcXuRPA</a>                                                                                                                                       |
| FOX 2 St. Louis     | News & Hot Takes | <a href="https://www.youtube.com/watch?v=JOh2ythcDiE">https://www.youtube.com/watch?v=JOh2ythcDiE</a>                                                                                                                                     |
| FOX 2 St. Louis     | News & Hot Takes | <a href="https://www.youtube.com/watch?v=oD-Ac03szWA">https://www.youtube.com/watch?v=oD-Ac03szWA</a>                                                                                                                                     |
| FOX 2 St. Louis     | News & Hot Takes | <a href="https://www.youtube.com/watch?v=PB-XBYhvv7Q">https://www.youtube.com/watch?v=PB-XBYhvv7Q</a>                                                                                                                                     |
| FOX 2 St. Louis     | News & Hot Takes | <a href="https://www.youtube.com/watch?v=sBaB7RI_2ow">https://www.youtube.com/watch?v=sBaB7RI_2ow</a>                                                                                                                                     |
| FOX 2 St. Louis     | News & Hot Takes | <a href="https://www.youtube.com/watch?v=tsHunting &amp; FishingQscfDioU">https://www.youtube.com/watch?v=tsHunting &amp; FishingQscfDioU</a>                                                                                             |
| FOX 2 St. Louis     | News & Hot Takes | <a href="https://www.youtube.com/watch?v=UuqYWSFNvhw">https://www.youtube.com/watch?v=UuqYWSFNvhw</a>                                                                                                                                     |
| FOX 2 St. Louis     | News & Hot Takes | <a href="https://www.youtube.com/watch?v=wMovies hPHunting &amp; FishingKHunting &amp; FishingHunting &amp; FishingoiE">https://www.youtube.com/watch?v=wMovies hPHunting &amp; FishingKHunting &amp; FishingHunting &amp; FishingoiE</a> |
| FOX 2 St. Louis     | News & Hot Takes | <a href="https://www.youtube.com/watch?v=W7V3XdZ-sxM">https://www.youtube.com/watch?v=W7V3XdZ-sxM</a>                                                                                                                                     |
| Queen Official      | Music            | <a href="https://www.youtube.com/watch?v=fJ9rUzIMcZQ">https://www.youtube.com/watch?v=fJ9rUzIMcZQ</a>                                                                                                                                     |

| <b>Channel Name</b>   | <b>Ecosystem</b> | <b>Link</b>                                                                                                                                                                           |
|-----------------------|------------------|---------------------------------------------------------------------------------------------------------------------------------------------------------------------------------------|
| Tommy Boy             | Music            | <a href="https://www.youtube.com/watch?v=fPO7Guns &amp; GearJlnzGuns &amp; Gearc">https://www.youtube.com/watch?v=fPO7Guns &amp; GearJlnzGuns &amp; Gearc</a>                         |
| Green Day             | Music            | <a href="https://www.youtube.com/watch?v=Soa3gO7tL-c">https://www.youtube.com/watch?v=Soa3gO7tL-c</a>                                                                                 |
| AudioslaveVEVO        | Music            | <a href="https://www.youtube.com/watch?v=7QU1nvuxaMA">https://www.youtube.com/watch?v=7QU1nvuxaMA</a>                                                                                 |
| Lil Baby Official 4PF | Music            | <a href="https://www.youtube.com/watch?v=_VDGysJGNoI">https://www.youtube.com/watch?v=_VDGysJGNoI</a>                                                                                 |
| fosterthepeopleVEVO   | Music            | <a href="https://www.youtube.com/watch?v=SDTZ7iX4vTQ">https://www.youtube.com/watch?v=SDTZ7iX4vTQ</a>                                                                                 |
| NLE CHOPPA            | Music            | <a href="https://www.youtube.com/watch?v=fyIcQ1Xl-rs">https://www.youtube.com/watch?v=fyIcQ1Xl-rs</a>                                                                                 |
| Yella Beezy           | Music            | <a href="https://www.youtube.com/watch?v=sHunting &amp; FishingQSTerhkHunting &amp; FishingE">https://www.youtube.com/watch?v=sHunting &amp; FishingQSTerhkHunting &amp; FishingE</a> |
| EminemMusic           | Music            | <a href="https://www.youtube.com/watch?v=FxQTY-WGuns &amp; GearGlo">https://www.youtube.com/watch?v=FxQTY-WGuns &amp; GearGlo</a>                                                     |
| ArianaGrandeVevo      | Music            | <a href="https://www.youtube.com/watch?v= SXiSVQZLjeHunting &amp; Fishing">https://www.youtube.com/watch?v= SXiSVQZLjeHunting &amp; Fishing</a>                                       |
| Tommy Boy             | Music            | <a href="https://www.youtube.com/watch?v=qA1nGPM9yHA">https://www.youtube.com/watch?v=qA1nGPM9yHA</a>                                                                                 |
| Green Day             | Music            | <a href="https://www.youtube.com/watch?v=r00ikilDxW4">https://www.youtube.com/watch?v=r00ikilDxW4</a>                                                                                 |
| Blake Shelton         | Music            | <a href="https://www.youtube.com/watch?v=asxrMSVrJOHunting &amp; Fishing">https://www.youtube.com/watch?v=asxrMSVrJOHunting &amp; Fishing</a>                                         |
| NLE CHOPPA            | Music            | <a href="https://www.youtube.com/watch?v=UJslIBQkcJg">https://www.youtube.com/watch?v=UJslIBQkcJg</a>                                                                                 |
| Blake Shelton         | Music            | <a href="https://www.youtube.com/watch?v=JXAgvGuns &amp; GearGuns &amp; GearMoviesJ14">https://www.youtube.com/watch?v=JXAgvGuns &amp; GearGuns &amp; GearMoviesJ14</a>               |
| Fueled By Ramen       | Music            | <a href="https://www.youtube.com/watch?v=eiiU-Fky1Hunting &amp; Fishings">https://www.youtube.com/watch?v=eiiU-Fky1Hunting &amp; Fishings</a>                                         |
| 7clouds               | Music            | <a href="https://www.youtube.com/watch?v=KxnpFKZowcs">https://www.youtube.com/watch?v=KxnpFKZowcs</a>                                                                                 |
| Fueled By Ramen       | Music            | <a href="https://www.youtube.com/watch?v=PmvHunting &amp; FishingaQKOGuns &amp; Geark0">https://www.youtube.com/watch?v=PmvHunting &amp; FishingaQKOGuns &amp; Geark0</a>             |
| 7clouds               | Music            | <a href="https://www.youtube.com/watch?v=GtEvysh1Guns &amp; GearMovies4">https://www.youtube.com/watch?v=GtEvysh1Guns &amp; GearMovies4</a>                                           |
| Warner Records Vault  | Music            | <a href="https://www.youtube.com/watch?v=wsrvmNtWU4E">https://www.youtube.com/watch?v=wsrvmNtWU4E</a>                                                                                 |

| <b>Channel Name</b>        | <b>Ecosystem</b> | <b>Link</b>                                                                                                                                                                                                       |
|----------------------------|------------------|-------------------------------------------------------------------------------------------------------------------------------------------------------------------------------------------------------------------|
| fosterthepeopleVEVO        | Music            | <a href="https://www.youtube.com/watch?v=LmHunting &amp; FishingcDPGuns &amp; GearddCg">https://www.youtube.com/watch?v=LmHunting &amp; FishingcDPGuns &amp; GearddCg</a>                                         |
| Warner Records Vault       | Music            | <a href="https://www.youtube.com/watch?v=4FcGuns &amp; Gear7yQsPqQ">https://www.youtube.com/watch?v=4FcGuns &amp; Gear7yQsPqQ</a>                                                                                 |
| Lil Baby Official 4PF      | Music            | <a href="https://www.youtube.com/watch?v=Ta4VBDPWbSc">https://www.youtube.com/watch?v=Ta4VBDPWbSc</a>                                                                                                             |
| The Glorious Sons          | Music            | <a href="https://www.youtube.com/watch?v=jUVDmVM9RtA">https://www.youtube.com/watch?v=jUVDmVM9RtA</a>                                                                                                             |
| The Glorious Sons          | Music            | <a href="https://www.youtube.com/watch?v=HggvsHLbheQ">https://www.youtube.com/watch?v=HggvsHLbheQ</a>                                                                                                             |
| Kurzgesagt – In a Nutshell | Gaming           | <a href="https://www.youtube.com/watch?v=3mnSDifDSxQ">https://www.youtube.com/watch?v=3mnSDifDSxQ</a>                                                                                                             |
| Markiplier                 | Gaming           | <a href="https://www.youtube.com/watch?v=9TjfkXmwbTs">https://www.youtube.com/watch?v=9TjfkXmwbTs</a>                                                                                                             |
| GameGrumps                 | Gaming           | <a href="https://www.youtube.com/watch?v=tuHe9lmMoviesvUE">https://www.youtube.com/watch?v=tuHe9lmMoviesvUE</a>                                                                                                   |
| ProZD                      | Gaming           | <a href="https://www.youtube.com/watch?v=GPUgij-Pn-4">https://www.youtube.com/watch?v=GPUgij-Pn-4</a>                                                                                                             |
| Markiplier                 | Gaming           | <a href="https://www.youtube.com/watch?v=ymjfVXnuweY">https://www.youtube.com/watch?v=ymjfVXnuweY</a>                                                                                                             |
| Kurzgesagt – In a Nutshell | Gaming           | <a href="https://www.youtube.com/watch?v=pP44EPBMbHunting &amp; FishingA">https://www.youtube.com/watch?v=pP44EPBMbHunting &amp; FishingA</a>                                                                     |
| Gus Johnson                | Gaming           | <a href="https://www.youtube.com/watch?v=DcjkHunting &amp; FishingvF4n3Hunting &amp; Fishing">https://www.youtube.com/watch?v=DcjkHunting &amp; FishingvF4n3Hunting &amp; Fishing</a>                             |
| RTGame                     | Gaming           | <a href="https://www.youtube.com/watch?v=oSoJkyePDvI">https://www.youtube.com/watch?v=oSoJkyePDvI</a>                                                                                                             |
| ProZD                      | Gaming           | <a href="https://www.youtube.com/watch?v= 01Z497SFaHunting &amp; Fishing">https://www.youtube.com/watch?v= 01Z497SFaHunting &amp; Fishing</a>                                                                     |
| Berd                       | Gaming           | <a href="https://www.youtube.com/watch?v=Bjt7mDVCLtk">https://www.youtube.com/watch?v=Bjt7mDVCLtk</a>                                                                                                             |
| Gus Johnson                | Gaming           | <a href="https://www.youtube.com/watch?v=ufhExQnUKUk">https://www.youtube.com/watch?v=ufhExQnUKUk</a>                                                                                                             |
| mikeburnfire               | Gaming           | <a href="https://www.youtube.com/watch?v=kbB-Guns &amp; GearLMF7Hunting &amp; FishingHunting &amp; Fishing">https://www.youtube.com/watch?v=kbB-Guns &amp; GearLMF7Hunting &amp; FishingHunting &amp; Fishing</a> |
| GameGrumps                 | Gaming           | <a href="https://www.youtube.com/watch?v=bO2j_hbIIo">https://www.youtube.com/watch?v=bO2j_hbIIo</a>                                                                                                               |

| <b>Channel Name</b> | <b>Ecosystem</b> | <b>Link</b>                                                                                                                                                                                                                   |
|---------------------|------------------|-------------------------------------------------------------------------------------------------------------------------------------------------------------------------------------------------------------------------------|
| TheRussianBadger    | Gaming           | <a href="https://www.youtube.com/watch?v=7kNfuHunting &amp; FishingQHunting &amp; Fishing3JHunting &amp; Fishing">https://www.youtube.com/watch?v=7kNfuHunting &amp; FishingQHunting &amp; Fishing3JHunting &amp; Fishing</a> |
| RTGame              | Gaming           | <a href="https://www.youtube.com/watch?v=glePWNkdGuns &amp; GearE4">https://www.youtube.com/watch?v=glePWNkdGuns &amp; GearE4</a>                                                                                             |
| teamfortress        | Gaming           | <a href="https://www.youtube.com/watch?v=QDCPKBF7a1Q">https://www.youtube.com/watch?v=QDCPKBF7a1Q</a>                                                                                                                         |
| Berd                | Gaming           | <a href="https://www.youtube.com/watch?v=ddfS4Z1ywbA">https://www.youtube.com/watch?v=ddfS4Z1ywbA</a>                                                                                                                         |
| gameranx            | Gaming           | <a href="https://www.youtube.com/watch?v=dI_WCZ3tR4I">https://www.youtube.com/watch?v=dI_WCZ3tR4I</a>                                                                                                                         |
| TheRussianBadger    | Gaming           | <a href="https://www.youtube.com/watch?v=OYUUr1fKj4k">https://www.youtube.com/watch?v=OYUUr1fKj4k</a>                                                                                                                         |
| gameranx            | Gaming           | <a href="https://www.youtube.com/watch?v=ru7BD1GHGuns &amp; GearU0">https://www.youtube.com/watch?v=ru7BD1GHGuns &amp; GearU0</a>                                                                                             |
| LetsPlay            | Gaming           | <a href="https://www.youtube.com/watch?v=fZIKkdoAJ7Hunting &amp; Fishing">https://www.youtube.com/watch?v=fZIKkdoAJ7Hunting &amp; Fishing</a>                                                                                 |
| Ahoy                | Gaming           | <a href="https://www.youtube.com/watch?v=4hk_km4MoviesLXY">https://www.youtube.com/watch?v=4hk_km4MoviesLXY</a>                                                                                                               |
| Ahoy                | Gaming           | <a href="https://www.youtube.com/watch?v=Hunting &amp; FishingT_OW9NHJHunting &amp; Fishing4">https://www.youtube.com/watch?v=Hunting &amp; FishingT_OW9NHJHunting &amp; Fishing4</a>                                         |
| LetsPlay            | Gaming           | <a href="https://www.youtube.com/watch?v=JMoviesTEDma4c_o">https://www.youtube.com/watch?v=JMoviesTEDma4c_o</a>                                                                                                               |
| LetsPlay            | Gaming           | <a href="https://www.youtube.com/watch?v=NVLLEXD3hJHY">https://www.youtube.com/watch?v=NVLLEXD3hJHY</a>                                                                                                                       |
| LetsPlay            | Gaming           | <a href="https://www.youtube.com/watch?v=tAkC-tpZvxk">https://www.youtube.com/watch?v=tAkC-tpZvxk</a>                                                                                                                         |
| KackisHD            | Gaming           | <a href="https://www.youtube.com/watch?v=NXHkeyBcmdw">https://www.youtube.com/watch?v=NXHkeyBcmdw</a>                                                                                                                         |
| mikeburnfire        | Gaming           | <a href="https://www.youtube.com/watch?v=12suwKpFoKE">https://www.youtube.com/watch?v=12suwKpFoKE</a>                                                                                                                         |
| mikeburnfire        | Gaming           | <a href="https://www.youtube.com/watch?v=9ZhFdw mUSKs">https://www.youtube.com/watch?v=9ZhFdw mUSKs</a>                                                                                                                       |
| mikeburnfire        | Gaming           | <a href="https://www.youtube.com/watch?v=yUVCCaeVNzY">https://www.youtube.com/watch?v=yUVCCaeVNzY</a>                                                                                                                         |
| Aztecross           | Gaming           | <a href="https://www.youtube.com/watch?v=iifhYy9zY1g">https://www.youtube.com/watch?v=iifhYy9zY1g</a>                                                                                                                         |



| <b>Channel Name</b> | <b>Ecosystem</b> | <b>Link</b>                                                                                                                                                                       |
|---------------------|------------------|-----------------------------------------------------------------------------------------------------------------------------------------------------------------------------------|
| KackisHD            | Gaming           | <a href="https://www.youtube.com/watch?v=0MvOIQ4cMoviesKA">https://www.youtube.com/watch?v=0MvOIQ4cMoviesKA</a>                                                                   |
| KackisHD            | Gaming           | <a href="https://www.youtube.com/watch?v=froVY9nlLCc">https://www.youtube.com/watch?v=froVY9nlLCc</a>                                                                             |
| Aztecross           | Gaming           | <a href="https://www.youtube.com/watch?v=Hunting&amp;Fishinga0lX2fRilQ">https://www.youtube.com/watch?v=Hunting &amp; Fishinga0lX2fRilQ</a>                                       |
| Aztecross           | Gaming           | <a href="https://www.youtube.com/watch?v=s92DDAxOJTY">https://www.youtube.com/watch?v=s92DDAxOJTY</a>                                                                             |
| Aztecross           | Gaming           | <a href="https://www.youtube.com/watch?v=XK3HuSzpjdI">https://www.youtube.com/watch?v=XK3HuSzpjdI</a>                                                                             |
| Aztecross           | Gaming           | <a href="https://www.youtube.com/watch?v=zdhugEZT1C4">https://www.youtube.com/watch?v=zdhugEZT1C4</a>                                                                             |
| teamfortress        | Gaming           | <a href="https://www.youtube.com/watch?v=MoviesLptAhOgGRw">https://www.youtube.com/watch?v=MoviesLptAhOgGRw</a>                                                                   |
| <b>teamfortress</b> | <b>Gaming</b>    | <a href="https://www.youtube.com/watch?v=JsSmz-Guns&amp;GearK-dA">https://www.youtube.com/watch?v=JsSmz-Guns &amp; GearK-dA</a>                                                   |
| <b>teamfortress</b> | <b>Gaming</b>    | <a href="https://www.youtube.com/watch?v=VqTk7FHOaFo">https://www.youtube.com/watch?v=VqTk7FHOaFo</a>                                                                             |
| Movieclips          | Movies           | <a href="https://www.youtube.com/watch?v=43OVmHunting&amp;FishingGuns&amp;Gear-4rU">https://www.youtube.com/watch?v=43OVmHunting &amp; FishingGuns &amp; Gear-4rU</a>             |
| Movieclips          | Movies           | <a href="https://www.youtube.com/watch?v=cXCMz340CRg">https://www.youtube.com/watch?v=cXCMz340CRg</a>                                                                             |
| Screen Rant         | Movies           | <a href="https://www.youtube.com/watch?v=0ESDnRQIX7A">https://www.youtube.com/watch?v=0ESDnRQIX7A</a>                                                                             |
| Screen Rant         | Movies           | <a href="https://www.youtube.com/watch?v=tHunting&amp;FishingDbaHunting&amp;Fishingp94Jc">https://www.youtube.com/watch?v=tHunting &amp; FishingDbaHunting &amp; Fishingp94Jc</a> |
| BeltFeds.Com, LLC   | Movies           | <a href="https://www.youtube.com/watch?v=XOfsMBGR7AA">https://www.youtube.com/watch?v=XOfsMBGR7AA</a>                                                                             |
| Bokoel1             | Movies           | <a href="https://www.youtube.com/watch?v=-RKpd-dWUDc">https://www.youtube.com/watch?v=-RKpd-dWUDc</a>                                                                             |
| Bokoel1             | Movies           | <a href="https://www.youtube.com/watch?v=CjuYqC9ImaHunting&amp;Fishing">https://www.youtube.com/watch?v=CjuYqC9ImaHunting &amp; Fishing</a>                                       |
| BurdenWorld         | Movies           | <a href="https://www.youtube.com/watch?v=KtbHQqFPZSQ">https://www.youtube.com/watch?v=KtbHQqFPZSQ</a>                                                                             |
| BurdenWorld         | Movies           | <a href="https://www.youtube.com/watch?v=PvdJNTxbjfl">https://www.youtube.com/watch?v=PvdJNTxbjfl</a>                                                                             |
| GORILLA             | Movies           | <a href="https://www.youtube.com/watch?v=vBD0TMoviesWaFLQ">https://www.youtube.com/watch?v=vBD0TMoviesWaFLQ</a>                                                                   |

| <b>Channel Name</b>                       | <b>Ecosystem</b> | <b>Link</b>                                                                                                                                                                           |
|-------------------------------------------|------------------|---------------------------------------------------------------------------------------------------------------------------------------------------------------------------------------|
| Gravity Industries                        | Movies           | <a href="https://www.youtube.com/watch?v=H4FUBfp9kS0">https://www.youtube.com/watch?v=H4FUBfp9kS0</a>                                                                                 |
| Gravity Industries                        | Movies           | <a href="https://www.youtube.com/watch?v=SoFlqIaDJHunting &amp; FishingU">https://www.youtube.com/watch?v=SoFlqIaDJHunting &amp; FishingU</a>                                         |
| Grjngo - Western Movies                   | Movies           | <a href="https://www.youtube.com/watch?v=TmReGI4tCCHunting &amp; Fishing">https://www.youtube.com/watch?v=TmReGI4tCCHunting &amp; Fishing</a>                                         |
| Grjngo - Western Movies                   | Movies           | <a href="https://www.youtube.com/watch?v=QLf7Z3SCyHunting &amp; FishingA">https://www.youtube.com/watch?v=QLf7Z3SCyHunting &amp; FishingA</a>                                         |
| Karma Jockey                              | Movies           | <a href="https://www.youtube.com/watch?v=Q2bonGz3c4">https://www.youtube.com/watch?v=Q2bonGz3c4</a>                                                                                   |
| Karma Jockey                              | Movies           | <a href="https://www.youtube.com/watch?v=QkgaQU2NIPQ">https://www.youtube.com/watch?v=QkgaQU2NIPQ</a>                                                                                 |
| Miami Vice                                | Movies           | <a href="https://www.youtube.com/watch?v=PzwNN7Ymgxk">https://www.youtube.com/watch?v=PzwNN7Ymgxk</a>                                                                                 |
| Miami Vice                                | Movies           | <a href="https://www.youtube.com/watch?v=LjDwkyATKdk">https://www.youtube.com/watch?v=LjDwkyATKdk</a>                                                                                 |
| Miami Vice                                | Movies           | <a href="https://www.youtube.com/watch?v=q-NYvMovies7nG3k">https://www.youtube.com/watch?v=q-NYvMovies7nG3k</a>                                                                       |
| Miami Vice                                | Movies           | <a href="https://www.youtube.com/watch?v=ZvhdYO4m3gc">https://www.youtube.com/watch?v=ZvhdYO4m3gc</a>                                                                                 |
| Sharpe                                    | Movies           | <a href="https://www.youtube.com/watch?v=VpoR3nmvjnw">https://www.youtube.com/watch?v=VpoR3nmvjnw</a>                                                                                 |
| Sharpe                                    | Movies           | <a href="https://www.youtube.com/watch?v=AIPivQZHOFHunting &amp; Fishing">https://www.youtube.com/watch?v=AIPivQZHOFHunting &amp; Fishing</a>                                         |
| TechZone                                  | Movies           | <a href="https://www.youtube.com/watch?v=BtuCV3aHunting &amp; FishingHunting &amp; FishingG4">https://www.youtube.com/watch?v=BtuCV3aHunting &amp; FishingHunting &amp; FishingG4</a> |
| TechZone                                  | Movies           | <a href="https://www.youtube.com/watch?v=0ZQXMovieskPbQs">https://www.youtube.com/watch?v=0ZQXMovieskPbQs</a>                                                                         |
| TechZone                                  | Movies           | <a href="https://www.youtube.com/watch?v=mUVBj9pdQQc">https://www.youtube.com/watch?v=mUVBj9pdQQc</a>                                                                                 |
| The King of Random                        | Movies           | <a href="https://www.youtube.com/watch?v=pm-7WzUrmzo">https://www.youtube.com/watch?v=pm-7WzUrmzo</a>                                                                                 |
| The King of Random                        | Movies           | <a href="https://www.youtube.com/watch?v=ctX3juq9Okw">https://www.youtube.com/watch?v=ctX3juq9Okw</a>                                                                                 |
| WayneDangerous                            | Movies           | <a href="https://www.youtube.com/watch?v=rMoviesgFrBldhk">https://www.youtube.com/watch?v=rMoviesgFrBldhk</a>                                                                         |
| WesternSaloonHunting & FishingGuns & Gear | Movies           | <a href="https://www.youtube.com/watch?v=wuwjk9DiLN4">https://www.youtube.com/watch?v=wuwjk9DiLN4</a>                                                                                 |

| <b>Channel Name</b>                       | <b>Ecosystem</b> | <b>Link</b>                                                                                                                                   |
|-------------------------------------------|------------------|-----------------------------------------------------------------------------------------------------------------------------------------------|
| WesternSaloonHunting & FishingGuns & Gear | Movies           | <a href="https://www.youtube.com/watch?v=TGYn9xxVoaY">https://www.youtube.com/watch?v=TGYn9xxVoaY</a>                                         |
| Forgotten Weapons                         | Guns & Gear      | <a href="https://www.youtube.com/watch?v=dGuns &amp; Gear9pw4PcBmE">https://www.youtube.com/watch?v=dGuns &amp; Gear9pw4PcBmE</a>             |
| Forgotten Weapons                         | Guns & Gear      | <a href="https://www.youtube.com/watch?v=QGKcvM2Hh4g">https://www.youtube.com/watch?v=QGKcvM2Hh4g</a>                                         |
| hickok4Movies                             | Guns & Gear      | <a href="https://www.youtube.com/watch?v=3W7sb9Zp-Hunting &amp; Fishingo">https://www.youtube.com/watch?v=3W7sb9Zp-Hunting &amp; Fishingo</a> |
| sootch00                                  | Guns & Gear      | <a href="https://www.youtube.com/watch?v=nT7Qe-prCQI">https://www.youtube.com/watch?v=nT7Qe-prCQI</a>                                         |
| hickok4Movies                             | Guns & Gear      | <a href="https://www.youtube.com/watch?v=soza_vYd-2E">https://www.youtube.com/watch?v=soza_vYd-2E</a>                                         |
| Langley Outdoors Academy                  | Guns & Gear      | <a href="https://www.youtube.com/watch?v=VIUUOczAzPM">https://www.youtube.com/watch?v=VIUUOczAzPM</a>                                         |
| Jerry Miculek - Pro Shooter               | Guns & Gear      | <a href="https://www.youtube.com/watch?v=WzHG-ibZaKM">https://www.youtube.com/watch?v=WzHG-ibZaKM</a>                                         |
| Langley Outdoors Academy                  | Guns & Gear      | <a href="https://www.youtube.com/watch?v=AeaykhzaIhw">https://www.youtube.com/watch?v=AeaykhzaIhw</a>                                         |
| mixup9Hunting & Fishing                   | Guns & Gear      | <a href="https://www.youtube.com/watch?v=soVaNrEjgYc">https://www.youtube.com/watch?v=soVaNrEjgYc</a>                                         |
| The Daily Shooter                         | Guns & Gear      | <a href="https://www.youtube.com/watch?v=SnEbw-oB7gA">https://www.youtube.com/watch?v=SnEbw-oB7gA</a>                                         |
| 22plinkster                               | Guns & Gear      | <a href="https://www.youtube.com/watch?v=ee3jMgidOVk">https://www.youtube.com/watch?v=ee3jMgidOVk</a>                                         |
| sootch00                                  | Guns & Gear      | <a href="https://www.youtube.com/watch?v=_7PCC_AeuMHunting &amp; Fishing">https://www.youtube.com/watch?v=_7PCC_AeuMHunting &amp; Fishing</a> |
| Jerry Miculek - Pro Shooter               | Guns & Gear      | <a href="https://www.youtube.com/watch?v=XkWIihaeuaY">https://www.youtube.com/watch?v=XkWIihaeuaY</a>                                         |
| TFB TV                                    | Guns & Gear      | <a href="https://www.youtube.com/watch?v=aJPsnFHBCEc">https://www.youtube.com/watch?v=aJPsnFHBCEc</a>                                         |
| TFB TV                                    | Guns & Gear      | <a href="https://www.youtube.com/watch?v=euxMRvTVaWg">https://www.youtube.com/watch?v=euxMRvTVaWg</a>                                         |
| TFB TV                                    | Guns & Gear      | <a href="https://www.youtube.com/watch?v=GIZALtOcMf0">https://www.youtube.com/watch?v=GIZALtOcMf0</a>                                         |
| 22plinkster                               | Guns & Gear      | <a href="https://www.youtube.com/watch?v=Ginch2koHHunting &amp; FishingE">https://www.youtube.com/watch?v=Ginch2koHHunting &amp; FishingE</a> |
| 704 TACTICAL                              | Guns & Gear      | <a href="https://www.youtube.com/watch?v=tglEzdFE0VHunting &amp; Fishing">https://www.youtube.com/watch?v=tglEzdFE0VHunting &amp; Fishing</a> |

| <b>Channel Name</b>     | <b>Ecosystem</b> | <b>Link</b>                                                                                                                                             |
|-------------------------|------------------|---------------------------------------------------------------------------------------------------------------------------------------------------------|
| mixup9Hunting & Fishing | Guns & Gear      | <a href="https://www.youtube.com/watch?v=FYbfVgK-vRs">https://www.youtube.com/watch?v=FYbfVgK-vRs</a>                                                   |
| The Daily Shooter       | Guns & Gear      | <a href="https://www.youtube.com/watch?v=MoviesHunting &amp; FishingUPGtxRJM4">https://www.youtube.com/watch?v=MoviesHunting &amp; FishingUPGtxRJM4</a> |
| The Daily Shooter       | Guns & Gear      | <a href="https://www.youtube.com/watch?v=zIxxTVGuns &amp; GearFw4I">https://www.youtube.com/watch?v=zIxxTVGuns &amp; GearFw4I</a>                       |
| Vortex Optics           | Guns & Gear      | <a href="https://www.youtube.com/watch?v=rId1Hunting &amp; Fishing_lgBv0">https://www.youtube.com/watch?v=rId1Hunting &amp; Fishing_lgBv0</a>           |
| 704 TACTICAL            | Guns & Gear      | <a href="https://www.youtube.com/watch?v=DXRUCyJg9EI">https://www.youtube.com/watch?v=DXRUCyJg9EI</a>                                                   |
| 704 TACTICAL            | Guns & Gear      | <a href="https://www.youtube.com/watch?v=W4w1wtLb7yc">https://www.youtube.com/watch?v=W4w1wtLb7yc</a>                                                   |
| Vortex Optics           | Guns & Gear      | <a href="https://www.youtube.com/watch?v=AFGa_aRDNHunting &amp; Fishing">https://www.youtube.com/watch?v=AFGa_aRDNHunting &amp; Fishing</a>             |
| Vortex Optics           | Guns & Gear      | <a href="https://www.youtube.com/watch?v=bgsu33qz9QI">https://www.youtube.com/watch?v=bgsu33qz9QI</a>                                                   |
| Vortex Optics           | Guns & Gear      | <a href="https://www.youtube.com/watch?v=ehvsrHunting &amp; Fishing1xhH0">https://www.youtube.com/watch?v=ehvsrHunting &amp; Fishing1xhH0</a>           |
| AtlanticFirearms        | Guns & Gear      | <a href="https://www.youtube.com/watch?v=ftn3eVDIeGuns &amp; GearA">https://www.youtube.com/watch?v=ftn3eVDIeGuns &amp; GearA</a>                       |
| AtlanticFirearms        | Guns & Gear      | <a href="https://www.youtube.com/watch?v=RVBKFI99eig">https://www.youtube.com/watch?v=RVBKFI99eig</a>                                                   |
| AtlanticFirearms        | Guns & Gear      | <a href="https://www.youtube.com/watch?v=YPXunxczDf4">https://www.youtube.com/watch?v=YPXunxczDf4</a>                                                   |
| GunsAmerica             | Guns & Gear      | <a href="https://www.youtube.com/watch?v=ciXRMoviesreHunting &amp; FishingWng">https://www.youtube.com/watch?v=ciXRMoviesreHunting &amp; FishingWng</a> |
| GunsAmerica             | Guns & Gear      | <a href="https://www.youtube.com/watch?v=Hk4CCHT_thc">https://www.youtube.com/watch?v=Hk4CCHT_thc</a>                                                   |
| GunsAmerica             | Guns & Gear      | <a href="https://www.youtube.com/watch?v=Kxu0HEK39Moviesc">https://www.youtube.com/watch?v=Kxu0HEK39Moviesc</a>                                         |
| GunsAmerica             | Guns & Gear      | <a href="https://www.youtube.com/watch?v=lDmzTuN4Qo0">https://www.youtube.com/watch?v=lDmzTuN4Qo0</a>                                                   |
| GunsAmerica             | Guns & Gear      | <a href="https://www.youtube.com/watch?v=VAIHHyDHtUs">https://www.youtube.com/watch?v=VAIHHyDHtUs</a>                                                   |
| Cheaper Than Dirt!      | Guns & Gear      | <a href="https://www.youtube.com/watch?v=Hunting &amp; FishingBMoviesuQW3TVRc">https://www.youtube.com/watch?v=Hunting &amp; FishingBMoviesuQW3TVRc</a> |
| Cheaper Than Dirt!      | Guns & Gear      | <a href="https://www.youtube.com/watch?v=9LDcbxRTOBA">https://www.youtube.com/watch?v=9LDcbxRTOBA</a>                                                   |

| <b>Channel Name</b>    | <b>Ecosystem</b> | <b>Link</b>                                                                                                                                                       |
|------------------------|------------------|-------------------------------------------------------------------------------------------------------------------------------------------------------------------|
| Cheaper Than Dirt!     | Guns & Gear      | <a href="https://www.youtube.com/watch?v=A-CszDMfATY">https://www.youtube.com/watch?v=A-CszDMfATY</a>                                                             |
| Cheaper Than Dirt!     | Guns & Gear      | <a href="https://www.youtube.com/watch?v=IHunting&amp;FishingVz19uhcW0">https://www.youtube.com/watch?v=IHunting&amp;FishingVz19uhcW0</a>                         |
| Cheaper Than Dirt!     | Guns & Gear      | <a href="https://www.youtube.com/watch?v=KK-xt1NiI-g">https://www.youtube.com/watch?v=KK-xt1NiI-g</a>                                                             |
| Cheaper Than Dirt!     | Guns & Gear      | <a href="https://www.youtube.com/watch?v=nduYryACBTQ">https://www.youtube.com/watch?v=nduYryACBTQ</a>                                                             |
| Cheaper Than Dirt!     | Guns & Gear      | <a href="https://www.youtube.com/watch?v=SV0Guns&amp;GearL_MPBj4">https://www.youtube.com/watch?v=SV0Guns&amp;GearL_MPBj4</a>                                     |
| Cheaper Than Dirt!     | Guns & Gear      | <a href="https://www.youtube.com/watch?v=tm4x7MoviesQVWUs">https://www.youtube.com/watch?v=tm4x7MoviesQVWUs</a>                                                   |
| Cheaper Than Dirt!     | Guns & Gear      | <a href="https://www.youtube.com/watch?v=TvtsnV3MaWw">https://www.youtube.com/watch?v=TvtsnV3MaWw</a>                                                             |
| Cheaper Than Dirt!     | Guns & Gear      | <a href="https://www.youtube.com/watch?v=ZtRHunting&amp;FishingCdRJNGuns&amp;Gearw">https://www.youtube.com/watch?v=ZtRHunting&amp;FishingCdRJNGuns&amp;Gearw</a> |
| Fire Mountain Outdoors | Guns & Gear      | <a href="https://www.youtube.com/watch?v=1vEOQH4LqBM">https://www.youtube.com/watch?v=1vEOQH4LqBM</a>                                                             |
| Fire Mountain Outdoors | Guns & Gear      | <a href="https://www.youtube.com/watch?v=3iS2N_PrIU">https://www.youtube.com/watch?v=3iS2N_PrIU</a>                                                               |
| Fire Mountain Outdoors | Guns & Gear      | <a href="https://www.youtube.com/watch?v=alaFyh_txGuns&amp;Gears">https://www.youtube.com/watch?v=alaFyh_txGuns&amp;Gears</a>                                     |
| Fire Mountain Outdoors | Guns & Gear      | <a href="https://www.youtube.com/watch?v=dZqQJHGlvue">https://www.youtube.com/watch?v=dZqQJHGlvue</a>                                                             |
| Fire Mountain Outdoors | Guns & Gear      | <a href="https://www.youtube.com/watch?v=I-DsfXA2OhU">https://www.youtube.com/watch?v=I-DsfXA2OhU</a>                                                             |
| Fire Mountain Outdoors | Guns & Gear      | <a href="https://www.youtube.com/watch?v=olahEwJMUiHunting&amp;Fishing">https://www.youtube.com/watch?v=olahEwJMUiHunting&amp;Fishing</a>                         |
| Fire Mountain Outdoors | Guns & Gear      | <a href="https://www.youtube.com/watch?v=SNhZiKWDCdY">https://www.youtube.com/watch?v=SNhZiKWDCdY</a>                                                             |
| Fire Mountain Outdoors | Guns & Gear      | <a href="https://www.youtube.com/watch?v=vUpPriDzXaM">https://www.youtube.com/watch?v=vUpPriDzXaM</a>                                                             |
| Fire Mountain Outdoors | Guns & Gear      | <a href="https://www.youtube.com/watch?v=WOnzMoviesMKx2iE">https://www.youtube.com/watch?v=WOnzMoviesMKx2iE</a>                                                   |
| Fire Mountain Outdoors | Guns & Gear      | <a href="https://www.youtube.com/watch?v=X0TP-yHunting&amp;FishingUD4E">https://www.youtube.com/watch?v=X0TP-yHunting&amp;FishingUD4E</a>                         |
| Fire Mountain Outdoors | Guns & Gear      | <a href="https://www.youtube.com/watch?v=YXIDsXN2cGI">https://www.youtube.com/watch?v=YXIDsXN2cGI</a>                                                             |

| <b>Channel Name</b>    | <b>Ecosystem</b>  | <b>Link</b>                                                                                                                                             |
|------------------------|-------------------|---------------------------------------------------------------------------------------------------------------------------------------------------------|
| Fire Mountain Outdoors | Guns & Gear       | <a href="https://www.youtube.com/watch?v=YzAxVkguWK0">https://www.youtube.com/watch?v=YzAxVkguWK0</a>                                                   |
| Keith Warren Hunting   | Hunting & Fishing | <a href="https://www.youtube.com/watch?v=GWiXBPfVcY">https://www.youtube.com/watch?v=GWiXBPfVcY</a>                                                     |
| Fieldsports Channel    | Hunting & Fishing | <a href="https://www.youtube.com/watch?v=TeixmGuns &amp; GearJMw_k">https://www.youtube.com/watch?v=TeixmGuns &amp; GearJMw_k</a>                       |
| Keith Warren Hunting   | Hunting & Fishing | <a href="https://www.youtube.com/watch?v=jejT_DOIgO4">https://www.youtube.com/watch?v=jejT_DOIgO4</a>                                                   |
| Keith Warren Hunting   | Hunting & Fishing | <a href="https://www.youtube.com/watch?v=PwqDAIwRJsE">https://www.youtube.com/watch?v=PwqDAIwRJsE</a>                                                   |
| STKO                   | Hunting & Fishing | <a href="https://www.youtube.com/watch?v=JOnMShWvloc">https://www.youtube.com/watch?v=JOnMShWvloc</a>                                                   |
| Airgun Depot           | Hunting & Fishing | <a href="https://www.youtube.com/watch?v=sGuns &amp; GearAMSuhiDNs">https://www.youtube.com/watch?v=sGuns &amp; GearAMSuhiDNs</a>                       |
| Fieldsports Channel    | Hunting & Fishing | <a href="https://www.youtube.com/watch?v=CuFk7MoviesHunting &amp; FishingKnzk">https://www.youtube.com/watch?v=CuFk7MoviesHunting &amp; FishingKnzk</a> |
| pyramydair             | Hunting & Fishing | <a href="https://www.youtube.com/watch?v=kBnoaaXtuQA">https://www.youtube.com/watch?v=kBnoaaXtuQA</a>                                                   |
| STKO                   | Hunting & Fishing | <a href="https://www.youtube.com/watch?v=SEg7VhMaNIU">https://www.youtube.com/watch?v=SEg7VhMaNIU</a>                                                   |
| 2lbsTrigrPull          | Hunting & Fishing | <a href="https://www.youtube.com/watch?v=PUtF0Guns &amp; Gear3ljJc">https://www.youtube.com/watch?v=PUtF0Guns &amp; Gear3ljJc</a>                       |
| Airgun Depot           | Hunting & Fishing | <a href="https://www.youtube.com/watch?v=AsYskbvweU">https://www.youtube.com/watch?v=AsYskbvweU</a>                                                     |
| Airgun Depot           | Hunting & Fishing | <a href="https://www.youtube.com/watch?v=fDchpX3TLGo">https://www.youtube.com/watch?v=fDchpX3TLGo</a>                                                   |
| Airgun Depot           | Hunting & Fishing | <a href="https://www.youtube.com/watch?v=fVDnYY3_Nfg">https://www.youtube.com/watch?v=fVDnYY3_Nfg</a>                                                   |
| americanairgunhunter   | Hunting & Fishing | <a href="https://www.youtube.com/watch?v=0Dg_ye4FJMoviesQ">https://www.youtube.com/watch?v=0Dg_ye4FJMoviesQ</a>                                         |
| americanairgunhunter   | Hunting & Fishing | <a href="https://www.youtube.com/watch?v=ID0Hunting &amp; FishingmrtJDjE">https://www.youtube.com/watch?v=ID0Hunting &amp; FishingmrtJDjE</a>           |
| americanairgunhunter   | Hunting & Fishing | <a href="https://www.youtube.com/watch?v=UJkq_e4H4AE">https://www.youtube.com/watch?v=UJkq_e4H4AE</a>                                                   |
| GamoOutdoor            | Hunting & Fishing | <a href="https://www.youtube.com/watch?v=UEgMovies49evj2c">https://www.youtube.com/watch?v=UEgMovies49evj2c</a>                                         |
| pyramydair             | Hunting & Fishing | <a href="https://www.youtube.com/watch?v=ABlFmXjPDi4">https://www.youtube.com/watch?v=ABlFmXjPDi4</a>                                                   |

| <b>Channel Name</b>           | <b>Ecosystem</b>  | <b>Link</b>                                                                                                                                                               |
|-------------------------------|-------------------|---------------------------------------------------------------------------------------------------------------------------------------------------------------------------|
| pyramydair                    | Hunting & Fishing | <a href="https://www.youtube.com/watch?v=IMpJccSX_Y_w">https://www.youtube.com/watch?v=IMpJccSX_Y_w</a>                                                                   |
| South Florida Fishing Channel | Hunting & Fishing | <a href="https://www.youtube.com/watch?v=1-MNSIOPL9s">https://www.youtube.com/watch?v=1-MNSIOPL9s</a>                                                                     |
| 2lbsTrigrPull                 | Hunting & Fishing | <a href="https://www.youtube.com/watch?v=-rCKzgY_x4">https://www.youtube.com/watch?v=-rCKzgY_x4</a>                                                                       |
| 2lbsTrigrPull                 | Hunting & Fishing | <a href="https://www.youtube.com/watch?v=1lqnrCLu-e0">https://www.youtube.com/watch?v=1lqnrCLu-e0</a>                                                                     |
| 2lbsTrigrPull                 | Hunting & Fishing | <a href="https://www.youtube.com/watch?v=3d1ArXthK7c">https://www.youtube.com/watch?v=3d1ArXthK7c</a>                                                                     |
| 2lbsTrigrPull                 | Hunting & Fishing | <a href="https://www.youtube.com/watch?v=edGuns &amp; GearvCi03VUU">https://www.youtube.com/watch?v=edGuns &amp; GearvCi03VUU</a>                                         |
| 2lbsTrigrPull                 | Hunting & Fishing | <a href="https://www.youtube.com/watch?v=SfLNxy93HhQ">https://www.youtube.com/watch?v=SfLNxy93HhQ</a>                                                                     |
| 2lbsTrigrPull                 | Hunting & Fishing | <a href="https://www.youtube.com/watch?v=vQCoCC-1ACHunting &amp; Fishing">https://www.youtube.com/watch?v=vQCoCC-1ACHunting &amp; Fishing</a>                             |
| AirGhandi                     | Hunting & Fishing | <a href="https://www.youtube.com/watch?v=LrJZhztGuns &amp; GearRY">https://www.youtube.com/watch?v=LrJZhztGuns &amp; GearRY</a>                                           |
| AirGhandi                     | Hunting & Fishing | <a href="https://www.youtube.com/watch?v=vSds2OkWLZU">https://www.youtube.com/watch?v=vSds2OkWLZU</a>                                                                     |
| Aspire Inx                    | Hunting & Fishing | <a href="https://www.youtube.com/watch?v=DH2u-hmYEGuns &amp; GearHunting &amp; Fishing">https://www.youtube.com/watch?v=DH2u-hmYEGuns &amp; GearHunting &amp; Fishing</a> |
| backyard plinking             | Hunting & Fishing | <a href="https://www.youtube.com/watch?v=Guns &amp; Geares7nApdnNM">https://www.youtube.com/watch?v=Guns &amp; Geares7nApdnNM</a>                                         |
| backyard plinking             | Hunting & Fishing | <a href="https://www.youtube.com/watch?v=BuzlGuns &amp; Gear0EMoviesYWI">https://www.youtube.com/watch?v=BuzlGuns &amp; Gear0EMoviesYWI</a>                               |
| backyard plinking             | Hunting & Fishing | <a href="https://www.youtube.com/watch?v=dD3ZQEKNMoviestic">https://www.youtube.com/watch?v=dD3ZQEKNMoviestic</a>                                                         |
| backyard plinking             | Hunting & Fishing | <a href="https://www.youtube.com/watch?v=LwiLLfXnRfw">https://www.youtube.com/watch?v=LwiLLfXnRfw</a>                                                                     |
| backyard plinking             | Hunting & Fishing | <a href="https://www.youtube.com/watch?v=QLGuns &amp; GearHGuns &amp; GearGsEALA">https://www.youtube.com/watch?v=QLGuns &amp; GearHGuns &amp; GearGsEALA</a>             |
| backyard plinking             | Hunting & Fishing | <a href="https://www.youtube.com/watch?v=tu74UHoWFBw">https://www.youtube.com/watch?v=tu74UHoWFBw</a>                                                                     |
| backyard plinking             | Hunting & Fishing | <a href="https://www.youtube.com/watch?v=TZerrDb-sDU">https://www.youtube.com/watch?v=TZerrDb-sDU</a>                                                                     |
| backyard plinking             | Hunting & Fishing | <a href="https://www.youtube.com/watch?v=UNB7GaNpobc">https://www.youtube.com/watch?v=UNB7GaNpobc</a>                                                                     |



| <b>Channel Name</b> | <b>Ecosystem</b>  | <b>Link</b>                                                                                                                       |
|---------------------|-------------------|-----------------------------------------------------------------------------------------------------------------------------------|
| backyard plinking   | Hunting & Fishing | <a href="https://www.youtube.com/watch?v=WmrsTwVhSXw">https://www.youtube.com/watch?v=WmrsTwVhSXw</a>                             |
| BrutuzGuns & Gear2  | Hunting & Fishing | <a href="https://www.youtube.com/watch?v=4t-b32Knmsw">https://www.youtube.com/watch?v=4t-b32Knmsw</a>                             |
| BrutuzGuns & Gear2  | Hunting & Fishing | <a href="https://www.youtube.com/watch?v=MoviesbAGzlyJWtk">https://www.youtube.com/watch?v=MoviesbAGzlyJWtk</a>                   |
| BrutuzGuns & Gear2  | Hunting & Fishing | <a href="https://www.youtube.com/watch?v=Guns &amp; GearYqW9Cn3Lg4">https://www.youtube.com/watch?v=Guns &amp; GearYqW9Cn3Lg4</a> |
| BrutuzGuns & Gear2  | Hunting & Fishing | <a href="https://www.youtube.com/watch?v=A_mAXHcBgb4">https://www.youtube.com/watch?v=A_mAXHcBgb4</a>                             |
| BrutuzGuns & Gear2  | Hunting & Fishing | <a href="https://www.youtube.com/watch?v=DDi2jreS70U">https://www.youtube.com/watch?v=DDi2jreS70U</a>                             |
| BrutuzGuns & Gear2  | Hunting & Fishing | <a href="https://www.youtube.com/watch?v=jSTIOeIRt4w">https://www.youtube.com/watch?v=jSTIOeIRt4w</a>                             |
| BrutuzGuns & Gear2  | Hunting & Fishing | <a href="https://www.youtube.com/watch?v=mL2KLLGuns &amp; GearGNy4">https://www.youtube.com/watch?v=mL2KLLGuns &amp; GearGNy4</a> |
| BrutuzGuns & Gear2  | Hunting & Fishing | <a href="https://www.youtube.com/watch?v=vuKopdSkj0A">https://www.youtube.com/watch?v=vuKopdSkj0A</a>                             |
| BrutuzGuns & Gear2  | Hunting & Fishing | <a href="https://www.youtube.com/watch?v=ZMovies_xIcSXJts">https://www.youtube.com/watch?v=ZMovies_xIcSXJts</a>                   |
| BrutuzGuns & Gear2  | Hunting & Fishing | <a href="https://www.youtube.com/watch?v=zHosuPkmZ2o">https://www.youtube.com/watch?v=zHosuPkmZ2o</a>                             |
| GamoOutdoor         | Hunting & Fishing | <a href="https://www.youtube.com/watch?v=7BINeUQy230">https://www.youtube.com/watch?v=7BINeUQy230</a>                             |
| GamoOutdoor         | Hunting & Fishing | <a href="https://www.youtube.com/watch?v=BcRAhY9KoIo">https://www.youtube.com/watch?v=BcRAhY9KoIo</a>                             |
| GamoOutdoor         | Hunting & Fishing | <a href="https://www.youtube.com/watch?v=BLRzYkPMoviesJV0">https://www.youtube.com/watch?v=BLRzYkPMoviesJV0</a>                   |
| GamoOutdoor         | Hunting & Fishing | <a href="https://www.youtube.com/watch?v=cZpviHwMovies-QQ">https://www.youtube.com/watch?v=cZpviHwMovies-QQ</a>                   |
| GamoOutdoor         | Hunting & Fishing | <a href="https://www.youtube.com/watch?v=dGuns &amp; Gear0vPMh9TNE">https://www.youtube.com/watch?v=dGuns &amp; Gear0vPMh9TNE</a> |
| GamoOutdoor         | Hunting & Fishing | <a href="https://www.youtube.com/watch?v=dJNouT0ijqs">https://www.youtube.com/watch?v=dJNouT0ijqs</a>                             |
| GamoOutdoor         | Hunting & Fishing | <a href="https://www.youtube.com/watch?v=jfB_beTTPXo">https://www.youtube.com/watch?v=jfB_beTTPXo</a>                             |
| GamoOutdoor         | Hunting & Fishing | <a href="https://www.youtube.com/watch?v=lwcQLlx-gNw">https://www.youtube.com/watch?v=lwcQLlx-gNw</a>                             |



| <b>Channel Name</b>           | <b>Ecosystem</b>  | <b>Link</b>                                                                                                                                 |
|-------------------------------|-------------------|---------------------------------------------------------------------------------------------------------------------------------------------|
| Joel Goodz                    | Hunting & Fishing | <a href="https://www.youtube.com/watch?v=RkaEldsPwks">https://www.youtube.com/watch?v=RkaEldsPwks</a>                                       |
| Joel Goodz                    | Hunting & Fishing | <a href="https://www.youtube.com/watch?v=TTr0jfVbC4c">https://www.youtube.com/watch?v=TTr0jfVbC4c</a>                                       |
| myairgunreviews               | Hunting & Fishing | <a href="https://www.youtube.com/watch?v=2xfZpgHunting&amp;FishingIxUY">https://www.youtube.com/watch?v=2xfZpgHunting &amp; FishingIxUY</a> |
| myairgunreviews               | Hunting & Fishing | <a href="https://www.youtube.com/watch?v=MoviesckK1OUddWo">https://www.youtube.com/watch?v=MoviesckK1OUddWo</a>                             |
| myairgunreviews               | Hunting & Fishing | <a href="https://www.youtube.com/watch?v=9PExiuSK1xk">https://www.youtube.com/watch?v=9PExiuSK1xk</a>                                       |
| myairgunreviews               | Hunting & Fishing | <a href="https://www.youtube.com/watch?v=CS1DvbMwQTA">https://www.youtube.com/watch?v=CS1DvbMwQTA</a>                                       |
| myairgunreviews               | Hunting & Fishing | <a href="https://www.youtube.com/watch?v=L7QimswXxsw">https://www.youtube.com/watch?v=L7QimswXxsw</a>                                       |
| myairgunreviews               | Hunting & Fishing | <a href="https://www.youtube.com/watch?v=TuKShOoIBew">https://www.youtube.com/watch?v=TuKShOoIBew</a>                                       |
| South Florida Fishing Channel | Hunting & Fishing | <a href="https://www.youtube.com/watch?v=PHScWXUMoviesbXI">https://www.youtube.com/watch?v=PHScWXUMoviesbXI</a>                             |
| Trotliners                    | Hunting & Fishing | <a href="https://www.youtube.com/watch?v=2Y3YPriarLU">https://www.youtube.com/watch?v=2Y3YPriarLU</a>                                       |
| Trotliners                    | Hunting & Fishing | <a href="https://www.youtube.com/watch?v=9ealk_zsbUg">https://www.youtube.com/watch?v=9ealk_zsbUg</a>                                       |
| Trotliners                    | Hunting & Fishing | <a href="https://www.youtube.com/watch?v=s_SipxA Guns &amp; GeartQk">https://www.youtube.com/watch?v=s_SipxA Guns &amp; GeartQk</a>         |
| Unrelated Activities          | Hunting & Fishing | <a href="https://www.youtube.com/watch?v=B9PIHunting&amp;FishingLNt97I">https://www.youtube.com/watch?v=B9PIHunting &amp; FishingLNt97I</a> |
| Unrelated Activities          | Hunting & Fishing | <a href="https://www.youtube.com/watch?v=dAgGzHG2V-c">https://www.youtube.com/watch?v=dAgGzHG2V-c</a>                                       |
| Unrelated Activities          | Hunting & Fishing | <a href="https://www.youtube.com/watch?v=lmHmxPMoviesShTE">https://www.youtube.com/watch?v=lmHmxPMoviesShTE</a>                             |
